# Supplementary material for: Jet activity on Enceladus linked to tidally driven strike-slip motion along tiger stripes
Source: Springer Nature journal article supplement (doi:10.1038/s41561-024-01418-0), 2024-04-29
Supplement: MOESM1 [file 41561_2024_1418_MOESM1_ESM.pdf]

# Jet activity on Enceladus linked to tidally driven strike-slip motion along tiger stripes

---

In the format provided by the  
authors and unedited

**Contents of this file**

1. Supplementary Table 1

**Table 1** Assumed parameter values used in this work. Parameter values are extracted from [9][27][28].

| Parameter | Value                 | Units             |
|-----------|-----------------------|-------------------|
| $\rho$    | 925                   | kg/m <sup>3</sup> |
| $\rho_w$  | 1007                  | kg/m <sup>3</sup> |
| $g_{out}$ | 0.113                 | m/s <sup>2</sup>  |
| $g_{int}$ | 0.120                 | m/s <sup>2</sup>  |
| $G$       | 3.3                   | GPa               |
| $\kappa$  | 8.8                   | GPa               |
| $e$       | 0.0047                | —                 |
| $\omega$  | $5.307 \cdot 10^{-5}$ | s <sup>-1</sup>   |
